# Supplementary material
Source: publisher figshare collection journal article supplement (https://sage.figshare.com/ndownloader/files/14221490)
Supplement: Supplementary file 1 [file 14221490]

Supplementary Table 1

*Multinomial Logistic Regression Models for Health Behavior Profiles among Korean Baby Boomers (Relative Risk Ratios)*

| Variables                                     | <u>Profile 1 (50%)</u><br><i>low-risk &amp;<br/>high-preventive</i> | <u>Profile 2 (35%)</u><br><i>low-risk &amp;<br/>low-preventive</i> | <u>Profile 3 (7%)</u><br><i>moderate-risk &amp;<br/>moderate-preventive</i> | <u>Profile 4 (6%)</u><br><i>moderate-risk &amp;<br/>high-preventive</i> | <u>Profile 5 (2%)</u><br><i>high-risk &amp;<br/>low-preventive</i> |
|-----------------------------------------------|---------------------------------------------------------------------|--------------------------------------------------------------------|-----------------------------------------------------------------------------|-------------------------------------------------------------------------|--------------------------------------------------------------------|
| <b>Predisposing characteristics</b>           |                                                                     |                                                                    |                                                                             |                                                                         |                                                                    |
| Age                                           | 1.04                                                                | 1.00                                                               | 0.96                                                                        | (1.00)                                                                  | 0.96                                                               |
| Female                                        | 22.35***                                                            | 11.43***                                                           | 0.75                                                                        | (1.00)                                                                  | 0.39                                                               |
| Married                                       | 1.03                                                                | 0.80                                                               | 0.75                                                                        | (1.00)                                                                  | 0.30*                                                              |
| Mastery <sup>a</sup>                          | 1.24                                                                | 0.90                                                               | 0.76                                                                        | (1.00)                                                                  | 0.57*                                                              |
| <b>Enabling characteristics</b>               |                                                                     |                                                                    |                                                                             |                                                                         |                                                                    |
| Education                                     |                                                                     |                                                                    |                                                                             |                                                                         |                                                                    |
| Less than high school <sup>b</sup>            | 0.89                                                                | 1.27                                                               | 1.72*                                                                       | (1.00)                                                                  | 3.21**                                                             |
| More than high school <sup>b</sup>            | 0.92                                                                | 0.79                                                               | 0.51**                                                                      | (1.00)                                                                  | 0.76                                                               |
| Household income <sup>c</sup>                 | 0.75                                                                | 0.57***                                                            | 0.70*                                                                       | (1.00)                                                                  | 0.72                                                               |
| Working                                       | 0.53*                                                               | 0.58                                                               | 0.79                                                                        | (1.00)                                                                  | 1.03                                                               |
| <b>Need characteristics</b>                   |                                                                     |                                                                    |                                                                             |                                                                         |                                                                    |
| Number of chronic diseases                    | 0.90                                                                | 0.89                                                               | 0.85                                                                        | (1.00)                                                                  | 1.02                                                               |
| Depressive symptoms <sup>d</sup>              | 1.30                                                                | 1.20                                                               | 1.24                                                                        | (1.00)                                                                  | 2.08*                                                              |
| Concerns with health and illness <sup>e</sup> | 1.25                                                                | 0.88                                                               | 0.73                                                                        | (1.00)                                                                  | 0.93                                                               |

*Note.* Reference profile = Profile 4 (moderate-risk and high-preventive). Likelihood ratio chi-square = 985.30.

<sup>a</sup>Mean of 2 items rated on a 4-point scale from 1 (*never*) to 4 (*often*). <sup>b</sup>Omitted category = high school diploma. <sup>c</sup>Logged income; units of 10,000 Won (Korean currency); at the time of this writing, 10,000 Won  $\approx$  8.7 USD. <sup>d</sup>Experienced depressive symptoms for at least 2 weeks or took the medication for depression. <sup>e</sup>Mean of 6 items rated on a 4-point scale from 1 (*never*) to 4 (*often*).

\* $p < .05$ . \*\* $p < .01$ . \*\*\* $p < .001$ .
